# Supplementary material for: Synthesis and Nonisothermal Crystallization Kinetics of Poly(Butylene Terephthalate-co-Tetramethylene Ether Glycol) Copolyesters
Source: PubMed Central journal article supplement (PMC7565969; doi:10.3390/polym12091897), 2020-08-24
Supplement: polymers-12-01897-s001.pdf [file polymers-12-01897-s001.pdf]

1

## Supporting Information

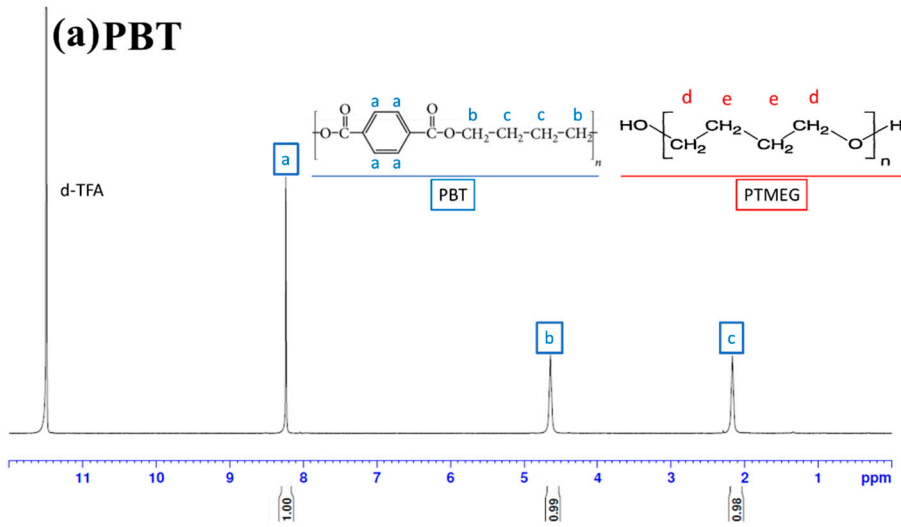

2

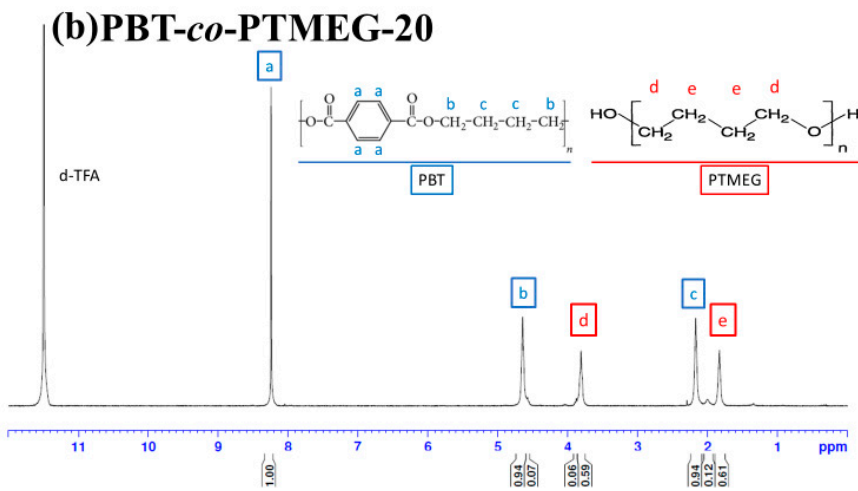

3

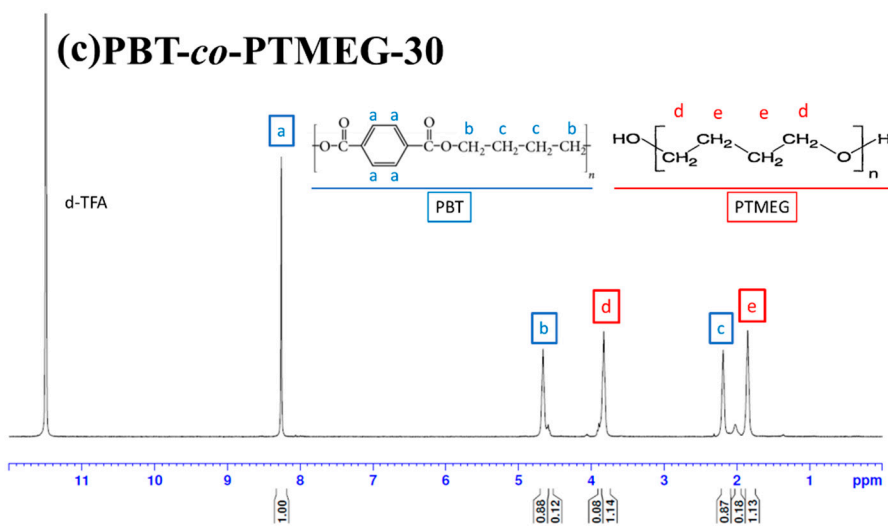

4

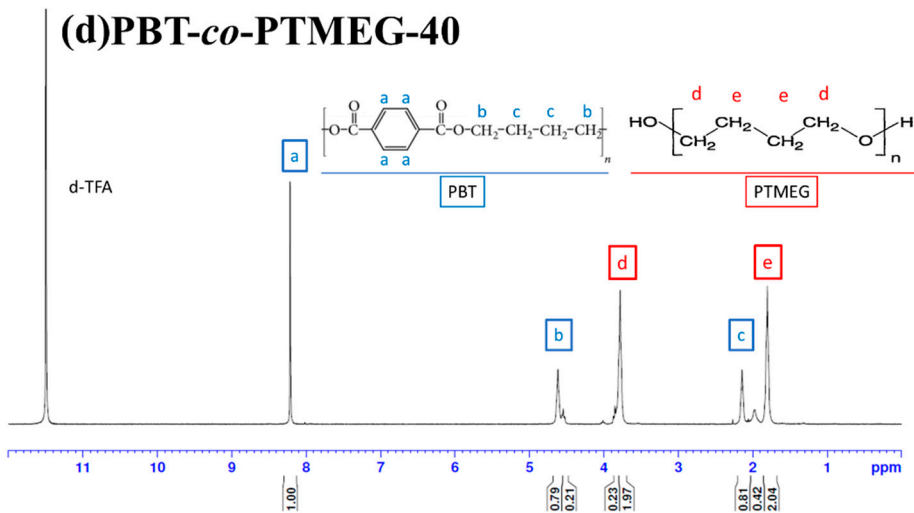

6 **Figure S1.**  $^1\text{H}$  NMR spectrum of copolymers (a) PBT (b) PBT-co-PTMEG-20 (c) PBT-co-PTMEG-  
 7 30 (d) PBT-co-PTMEG-40.

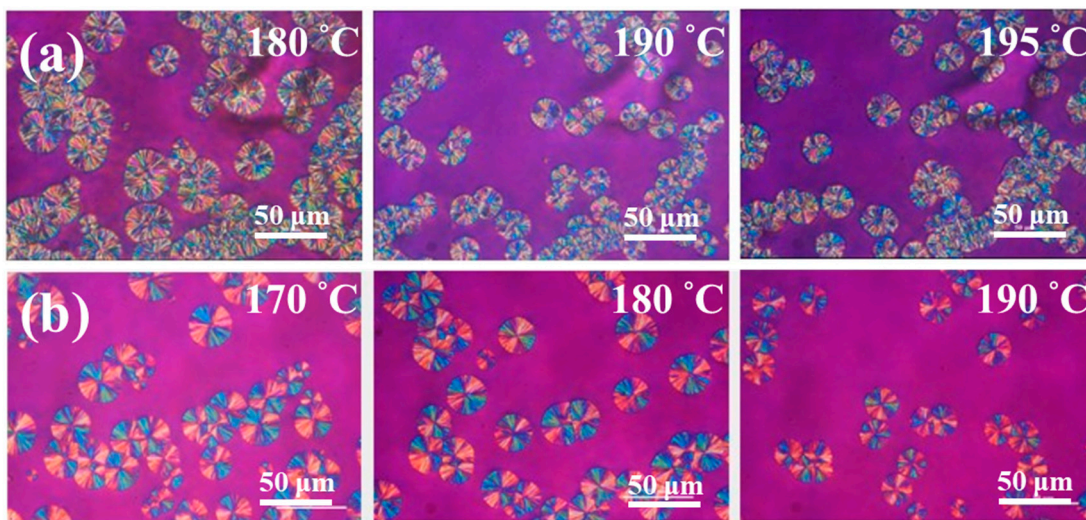

10 **Figure S2.** PLM image of PBT-co-PTMEG at the selected temperature (a) PBT-co-PTMEG-20 (b)  
 11 PBT-co-PTMEG-30.  
 12
